# Supplementary material
Source: PubMed Central journal article supplement (PMC6689234)
Supplement: NIHMS963123-supplement-2.pdf [file NIHMS963123-supplement-2.pdf]

## Supplement 2

Meeker D, Linder JA, Fox CR, et al. Effect of behavioral interventions on inappropriate antibiotic prescribing among primary care practices: a randomized clinical trial. *JAMA*. doi:10.1001/jama.2016.0275.

**eFigure 1.** Study Timeline

**eTable 1.** Qualifying Revisit Diagnostic Codes

**eTable 2.** Sample Characteristics During the 18-month Baseline Period

**eTable 3.** Coefficient Estimates From Main Hierarchical Logistic Model to Estimate Intervention Effects on Inappropriate Antibiotic Prescribing Trajectories

**eTable 4A.** Coefficient Estimates for the Fully Interacted Logistic Model Estimated With Robust Standard Errors to Estimate Intervention Effects on Inappropriate Antibiotic Prescribing Trajectories, for Wald Test

**eTable 4B.** Coefficient Estimates for the Main Effects Only Logistic Model Estimated With Robust Standard Errors to Estimate Intervention Effects on Inappropriate Antibiotic Prescribing Trajectories, for Wald Test

**eTable 5.** Coefficient Estimates From Sensitivity Analysis: Simplified Hierarchical Logistic Model to Estimate Intervention Effects on Inappropriate Antibiotic Prescribing Rates, Comparing 18-Month Baseline to 18-Month Intervention Period

**eTable 6.** Coefficient Estimates From Logistic Model to Estimate Intervention Effects on Proportion of all Acute Respiratory Infections Coded as Antibiotic-Appropriate Diagnoses

**eTable 7.** Rate of Return Visit With Diagnosis of Concern, When Antibiotics Were Not Prescribed at the Index Visit, by Study Arm

**eTable 8.** Specific Diagnoses of Concern Associated With Return Visits for Which Antibiotics Might Have Been Helpful in the Initial Visit

This supplementary material has been provided by the authors to give readers additional information about their work.

**eFigure 1. Study Timeline (See excel spreadsheet for original version)**

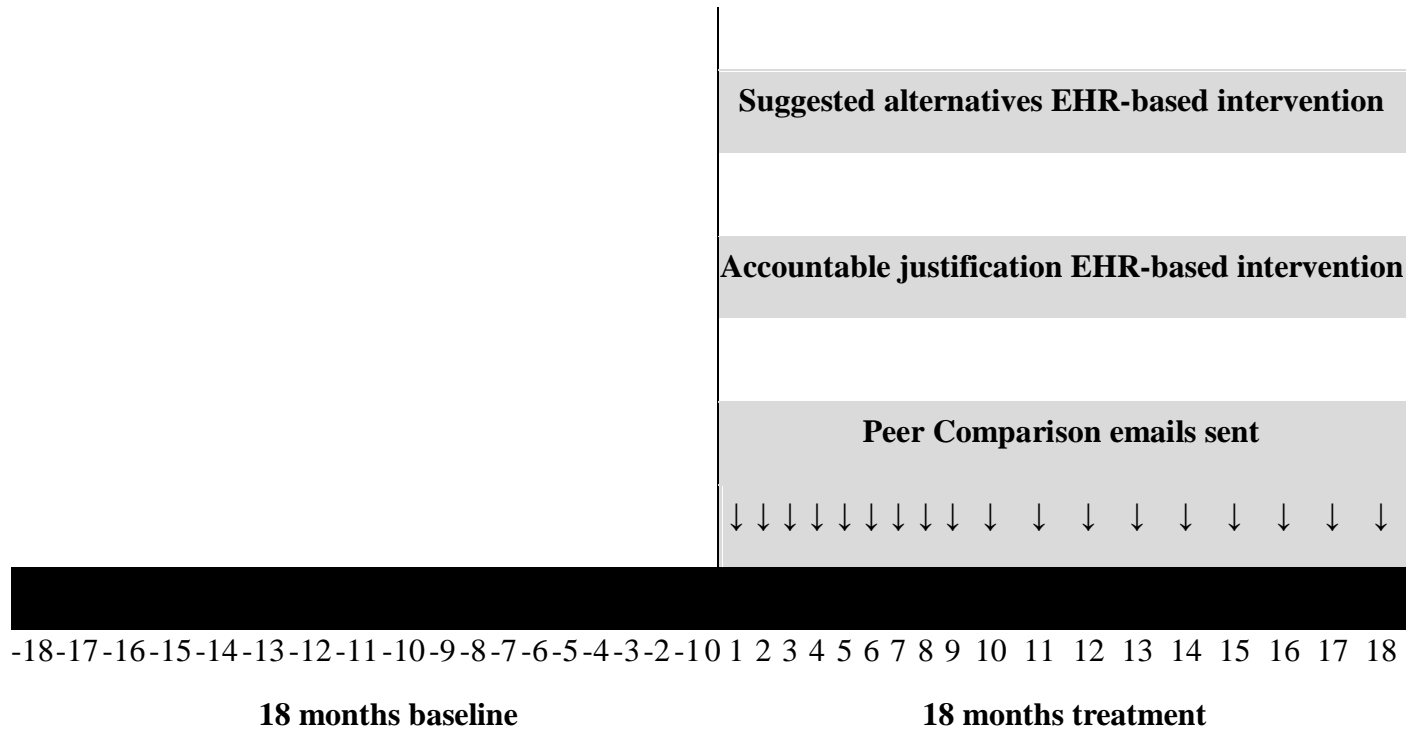

**eTable 1. Qualifying Revisit Diagnostic Codes**

| <b>ICD 9 code</b> | <b>description</b>                                                   | <b>category</b>                  |
|-------------------|----------------------------------------------------------------------|----------------------------------|
| 390-392           | Acute rheumatic fever code family                                    | acute rheumatic fever            |
| 528.3             | Cellulitis and abscess--Cellulitis of mouth (floor), Ludwig's angina | Head and Neck Abscess            |
| 324               | Intracranial abscess                                                 | Head and Neck Abscess            |
| 475               | Peritonsillar abscess                                                | Head and Neck Abscess            |
| 682.1             | Other cellulitis and abscess, neck                                   | Head and Neck Abscess            |
| 478.21            | Cellulitis of pharynx or nasopharynx                                 | Head and Neck Abscess            |
| 478.22            | Parapharyngeal abscess                                               | Head and Neck Abscess            |
| 478.24            | Retropharyngeal abscess                                              | Head and Neck Abscess            |
| 478.71            | Cellulitis and perichondritis of larynx                              | Head and Neck Abscess            |
| 478.29            | Other Abscess of pharynx or nasopharynx                              | Head and Neck Abscess            |
| 478.9             | Abscess of trachea                                                   | Head and Neck Abscess            |
| 325               | Phlebitis and thrombophlebitis of intracranial venous sinuses        | Head and Neck Abscess            |
| 324               | Intracranial Abscess                                                 | Head and Neck Abscess            |
| 040.3             | Necrobacillosis                                                      | Lemierre's Syndrome              |
| 383               | Acute mastoiditis                                                    | Mastoiditis                      |
| 383               | Acute mastoiditis without complications                              | Mastoiditis                      |
| 383.01            | Subperiosteal abscess of mastoid                                     | Mastoiditis                      |
| 383.02            | Acute mastoiditis with other complications                           | Mastoiditis/Gradenigo's syndrome |
| 320               | Bacterial meningitis                                                 | meningitis                       |
| 320               | Hemophilus meningitis                                                | meningitis                       |
| 320.1             | Pneumococcal meningitis                                              | meningitis                       |
| 320.2             | Streptococcal meningitis                                             | meningitis                       |
| 320.3             | Staphylococcal meningitis                                            | meningitis                       |

**eTable 1. Qualifying Revisit Diagnostic Codes, Continued**

| <b>ICD 9 code</b> | <b>description</b>                 | <b>category</b> |
|-------------------|------------------------------------|-----------------|
| 320.8             | Bacterial meningitis nec           | meningitis      |
| 320.81            | Anaerobic meningitis               | meningitis      |
| 320.89            | Meningitis oth spcf bact           | meningitis      |
| 320.9             | Bacterial meningitis nos           | meningitis      |
| 321               | Other organism meningitis          | meningitis      |
| 322               | Meningitis, unspecified            | meningitis      |
| 322               | Nonpyogenic meningitis             | meningitis      |
| 322.9             | Meningitis not otherwise specified | meningitis      |
| 376.01            | Orbital cellulitis                 | cellulitis eye  |
| 073               | Ornithosis pneumonia               | pneumonia       |
| 481               | Pneumococcal pneumonia             | pneumonia       |
| 482               | Other bacterial pneumonia          | pneumonia       |
| 482               | K. pneumoniae pneumonia            | pneumonia       |
| 482.1             | Pseudomonal pneumonia              | pneumonia       |
| 482.2             | H. influenzae pneumonia            | pneumonia       |
| 482.3             | Streptococcal pneumonia            | pneumonia       |
| 482.31            | Pneumonia strptococcus a           | pneumonia       |
| 482.32            | Pneumonia strptococcus b           | pneumonia       |
| 482.39            | Pneumonia oth strep                | pneumonia       |
| 482.4             | Staphylococcal pneumonia           | pneumonia       |
| 482.49            | Staph pneumonia nec                | pneumonia       |
| 482.8             | Bacterial pneumonia nec            | pneumonia       |
| 482.81            | Pneumonia anaerobes                | pneumonia       |
| 482.82            | Pneumonia e coli                   | pneumonia       |

**eTable 1. Qualifying Revisit Diagnostic Codes, Continued**

| <b>ICD 9 code</b> | <b>description</b>       | <b>category</b> |
|-------------------|--------------------------|-----------------|
| 482.89            | Pneumonia oth spcf bact  | pneumonia       |
| 482.9             | Bacterial pneumonia nos  | pneumonia       |
| 483               | pneumonia: organism nec  | pneumonia       |
| 483               | Pneu mycplsm pneumoniae  | pneumonia       |
| 483.1             | Pneumonia d/t chlamydia  | pneumonia       |
| 484.3             | Pneumonia in whoop cough | pneumonia       |
| 484.5             | Pneumonia in anthrax     | pneumonia       |
| 485               | Bronchopneumonia org nos | pneumonia       |
| 486               | pneumonia, organism nos  | pneumonia       |
| 487               | influenza with pneumonia | pneumonia       |
| 997.31            | ventltr assoc pneumonia  | pneumonia       |
| 771.81            | nb septicemia [sepsis]   | sepsis          |
| 995.91            | sepsis                   | sepsis          |
| 995.92            | severe sepsis            | sepsis          |

**eTable 2. Sample Characteristics During the 18-Month Baseline Period**

| <b>Patient characteristics</b>        | <b>Overall</b> | <b>Control</b> | <b>Suggested Alternatives</b> | <b>Accountable Justification</b> | <b>Peer Comparison</b> | <b>Suggested Alternatives + Accountable Justification</b> | <b>Suggested Alternatives + Peer Comparison</b> | <b>Accountable Justification + Peer Comparison</b> | <b>Suggested Alternatives + Accountable Justification + Peer Comparison</b> |
|---------------------------------------|----------------|----------------|-------------------------------|----------------------------------|------------------------|-----------------------------------------------------------|-------------------------------------------------|----------------------------------------------------|-----------------------------------------------------------------------------|
| Mean age, years (SD)                  | 47 (17)        | 48 (16)        | 47 (17)                       | 54 (17)                          | 47 (16)                | 46 (16)                                                   | 48 (16)                                         | 48 (17)                                            | 43 (17)                                                                     |
| Male sex, No. (%)                     | 4644 (31)      | 669 (36)       | 594 (28)                      | 583 (39)                         | 385 (31)               | 523 (26)                                                  | 418 (28)                                        | 780 (33)                                           | 692 (32)                                                                    |
| Race, No. (%)*                        |                |                |                               |                                  |                        |                                                           |                                                 |                                                    |                                                                             |
| White                                 | 12192 (87)     | 1397 (82)      | 1654 (82)                     | 1324 (91)                        | 1018 (87)              | 1648 (87)                                                 | 1298 (87)                                       | 2068 (91)                                          | 1785 (88)                                                                   |
| Black                                 | 566 (4)        | 60 (4)         | 115 (6)                       | 51 (4)                           | 50 (4)                 | 69 (4)                                                    | 84 (6)                                          | 46 (2)                                             | 91 (5)                                                                      |
| Asian                                 | 545 (4)        | 55 (3)         | 60 (3)                        | 32 (2)                           | 65 (6)                 | 88 (5)                                                    | 40 (3)                                          | 110 (5)                                            | 95 (4)                                                                      |
| Other Race/Unknown                    | 761 (5)        | 201 (12)       | 195 (10)                      | 47 (3)                           | 37 (3)                 | 93 (5)                                                    | 70 (5)                                          | 58 (3)                                             | 60 (3)                                                                      |
| Hispanic or Latino ethnicity, No. (%) | 6460 (44)      | 883 (47)       | 738 (35)                      | 492 (33)                         | 459 (37)               | 758 (38)                                                  | 787 (52)                                        | 1099 (47)                                          | 1244 (57)                                                                   |
| Insurance type, No (%)*               |                |                |                               |                                  |                        |                                                           |                                                 |                                                    |                                                                             |
| Medicare                              | 1585 (14)      | 187 (13)       | 209 (13)                      | 204 (20)                         | 111 (12)               | 207 (13)                                                  | 133 (12)                                        | 321 (17)                                           | 213 (13)                                                                    |
| State or county subsidized**          | 4306 (39)      | 627 (43)       | 554 (36)                      | 172 (17)                         | 351 (37)               | 652 (42)                                                  | 480 (42)                                        | 727 (39)                                           | 743 (46)                                                                    |

**Table 2, Sample Characteristics During the 18-Month Baseline Period, Continued**

| <b>Patient characteristics</b>     | <b>Overall</b> | <b>Control</b> | <b>Suggested Alternatives</b> | <b>Accountable Justification</b> | <b>Peer Comparison</b> | <b>Suggested Alternatives + Accountable Justification</b> | <b>Suggested Alternatives + Peer Comparison</b> | <b>Accountable Justification + Peer Comparison</b> | <b>Suggested Alternatives + Accountable Justification + Peer Comparison</b> |
|------------------------------------|----------------|----------------|-------------------------------|----------------------------------|------------------------|-----------------------------------------------------------|-------------------------------------------------|----------------------------------------------------|-----------------------------------------------------------------------------|
| Private                            | 4921 (44)      | 619 (43)       | 775 (50)                      | 534 (51)                         | 454 (48)               | 658 (43)                                                  | 471 (41)                                        | 771 (42)                                           | 639 (39)                                                                    |
| Self-pay or other                  | 327 (3)        | 22 (1)         | 18 (1)                        | 217 (12)                         | 22 (2)                 | 22 (2)                                                    | 58 (5)                                          | 23 (1)                                             | 35 (2)                                                                      |
| <b>Number of qualifying visits</b> | 14753          | 1866           | 2132                          | 1491                             | 1236                   | 1977                                                      | 1511                                            | 2362                                               | 2178                                                                        |

\*Cell counts may not sum to total due to missing values

\*\*Includes Medicaid and other public payers

**eTable 3. Coefficient Estimates From Main Hierarchical Logistic Model to Estimate Intervention Effects on Inappropriate Antibiotic Prescribing Trajectories**

| <b>Variable</b>                                    | <b>Coefficient</b> | <b>SE</b> | <b>(95% CI)</b> | <b>z</b> | <b>P value</b> |
|----------------------------------------------------|--------------------|-----------|-----------------|----------|----------------|
| Suggested alternatives                             | -0.025             | 0.235     | (-0.485,0.435)  | -0.11    | 0.916          |
| Accountable justification                          | 0.105              | 0.236     | (-0.358,0.567)  | 0.44     | 0.658          |
| Peer comparison                                    | -0.284             | 0.242     | (-0.758,0.189)  | -1.18    | 0.240          |
| Months in treatment                                | -0.010             | 0.008     | (-0.025,0.005)  | -1.35    | 0.176          |
| Suggested alternatives ×<br>Months in treatment    | -0.003             | 0.006     | (-0.015,0.009)  | -0.45    | 0.655          |
| Accountable justification ×<br>Months in treatment | -0.029             | 0.006     | (-0.041,-0.017) | -4.72    | < 0.001        |
| Peer comparison × Months in<br>treatment           | -0.047             | 0.006     | (-0.060,-0.035) | -7.37    | < 0.001        |
| Time (months)                                      | -0.031             | 0.004     | (-0.038,-0.024) | -8.81    | < 0.001        |
| Constant                                           | -1.145             | 0.235     | (-1.607,-0.683) | -4.86    | < 0.001        |

Note: These coefficient estimates are from the same model used to generate Figure 2.



**eTable 4A. Coefficient Estimates for the Fully Interacted Logistic Model Estimated With Robust Standard Errors to Estimate Intervention Effects on Inappropriate Antibiotic Prescribing Trajectories, for Wald Test**

| <b>Variable</b>                                                           | <b>Coefficient</b> | <b>Robust SE*</b> | <b>95% CI</b>  | <b>z</b> | <b>P value</b> |
|---------------------------------------------------------------------------|--------------------|-------------------|----------------|----------|----------------|
| Suggested Alternatives                                                    | 0.506              | 0.493             | (-0.461,1.471) | 1.03     | 0.304          |
| Accountable Justification                                                 | -0.205             | 0.455             | (-1.101,0.691) | -0.45    | 0.652          |
| Peer Comparison                                                           | -0.082             | 0.612             | (-1.281,1.121) | -0.13    | 0.893          |
| Suggested Alternatives × Accountable Justification                        | -0.389             | 0.558             | (-1.481,0.701) | -0.7     | 0.485          |
| Suggested Alternatives × Peer Comparison                                  | -1.079             | 0.693             | (-2.441,0.281) | -1.56    | 0.119          |
| Accountable Justification × Peer Comparison                               | 0.212              | 0.801             | (-1.361,1.781) | 0.26     | 0.792          |
| Suggested Alternatives × Accountable Justification × Peer Comparison      | 0.539              | 0.884             | (-1.191,2.271) | 0.61     | 0.542          |
| Months in Treatment                                                       | -0.012             | 0.025             | (-0.061,0.041) | -0.48    | 0.628          |
| Suggested Alternatives × Months in Treatment                              | -0.018             | 0.033             | (-0.081,0.051) | -0.55    | 0.579          |
| Accountable Justification × Months in Treatment                           | -0.025             | 0.029             | (-0.081,0.031) | -0.86    | 0.389          |
| Suggested Alternatives × Accountable Justifications × Months in Treatment | -0.001             | 0.038             | (-0.081,0.071) | -0.02    | 0.981          |
| Peer Comparison × Months in Treatment                                     | -0.025             | 0.033             | (-0.091,0.041) | -0.76    | 0.45           |
| Suggested Alternatives × Peer Comparison × Months in Treatment            | -0.056             | 0.048             | (-0.151,0.041) | -1.17    | 0.241          |
| Accountable Justification × Peer Comparison × Months in Treatment         | -0.040             | 0.049             | (-0.141,0.061) | -0.82    | 0.413          |

**eTable 4A, Continued**

| <b>Variable</b>                                                                                     | <b>Coefficient</b> | <b>Robust SE*</b> | <b>95% CI</b>   | <b>z</b> | <b>P value</b> |
|-----------------------------------------------------------------------------------------------------|--------------------|-------------------|-----------------|----------|----------------|
| Suggested Alternatives ×<br>Accountable Justification<br>× Peer Comparison ×<br>Months in Treatment | 0.091              | 0.063             | (-0.031,0.211)  | 1.44     | 0.149          |
| Time (months)                                                                                       | -0.023             | 0.009             | (-0.041,-0.011) | -2.59    | 0.01           |
| Constant                                                                                            | -0.789             | 0.368             | (-1.511,-0.071) | -2.14    | 0.032          |

\*Robust Standard errors were used in this approach because for the Wald test, the fully interacted hierarchical mixed effects model did not converge

**eTable 4B. Coefficient Estimates for the Main Effects Only Logistic Model Estimated With Robust Standard Errors to Estimate Intervention Effects on Inappropriate Antibiotic Prescribing Trajectories, for Wald Test**

| <b>Variable</b>                                     | <b>Coefficient</b> | <b>Robust SE</b> | <b>95% CI</b>    | <b>z</b> | <b>P value</b> |
|-----------------------------------------------------|--------------------|------------------|------------------|----------|----------------|
| Suggested Alternatives                              | -0.053             | 0.257            | (-0.557, 0.450)  | -0.21    | 0.835          |
| Accountable Justifications                          | -0.172             | 0.244            | (-0.651, 0.307)  | -0.7     | 0.481          |
| Peer Comparisons                                    | -0.381             | 0.241            | (-0.853, 0.091)  | -1.58    | 0.114          |
| Months in Treatment                                 | -0.023             | 0.010            | (-0.043, -0.004) | -2.4     | 0.017          |
| Suggested Alternatives X<br>Months in Treatment     | -0.010             | 0.019            | (-0.046, 0.027)  | -0.52    | 0.604          |
| Accountable Justifications X Months in<br>Treatment | -0.035             | 0.017            | (-0.067, -0.002) | -2.1     | 0.036          |
| Peer Comparisons X<br>Months in Treatment           | -0.047             | 0.019            | (-0.084, -0.009) | -2.45    | 0.014          |
| Time (months)                                       | -0.012             | 0.018            | (-0.048, 0.023)  | -0.68    | 0.499          |
| Constant                                            | -0.593             | 0.261            | (-1.104, -0.083) | -2.28    | 0.023          |

The Wald test comparing this fully interacted model to the main effects-only model showed no statistically significant improvement in explanatory power associated with inclusion of the interaction terms (P=0.168).

**eTable 5. Coefficient Estimates From Sensitivity Analysis: Simplified Hierarchical Logistic Model to Estimate Intervention Effects on Inappropriate Antibiotic Prescribing Rates, Comparing 18-Month Baseline to 18-Month Intervention Period**

| <b>Variable</b>                              | <b>Coefficient</b> | <b>SE</b> | <b>(95% CI)</b> | <b>z</b> | <b>P value</b> |
|----------------------------------------------|--------------------|-----------|-----------------|----------|----------------|
| Suggested alternatives                       | -.018              | .235      | (-.480, .443)   | -0.08    | 0.939          |
| Accountable justification                    | .095               | .236      | (-.368, .559)   | 0.40     | 0.688          |
| Peer comparison                              | -.329              | .242      | (-.805, .146)   | -1.36    | 0.175          |
| Treatment period                             | -.806              | .060      | (-.924, -.688)  | -13.39   | 0.001          |
| Suggested alternatives × Treatment period    | -.009              | .063      | (-.133, .114)   | -0.15    | 0.884          |
| Accountable justification × Treatment period | -.215              | .064      | (-.341, -.089)  | -3.36    | 0.001          |
| Peer comparison × Treatment period           | -.211              | 0.64      | (-.338, -.084)  | -3.26    | 0.001          |
| Constant                                     | -.801              | .235      | (-1.26, -.340)  | -3.41    | 0.001          |

**eTable 6. Coefficient Estimates From Logistic Model to Estimate Intervention Effects on Proportion of all Acute Respiratory Infections Coded as Antibiotic-Appropriate Diagnoses**

| <b>Variable</b>                                 | <b>Coefficient</b> | <b>Robust SE*</b> | <b>(95% CI)</b>  | <b>z</b> | <b>P value</b> |
|-------------------------------------------------|--------------------|-------------------|------------------|----------|----------------|
| Suggested alternatives                          | 0.274              | 0.145             | (-0.011, 0.559)  | 1.89     | 0.059          |
| Accountable justification                       | -0.123             | 0.164             | (-0.445, 0.198)  | -0.75    | 0.451          |
| Peer comparison                                 | 0.065              | 0.170             | (-0.269, 0.400)  | 0.38     | 0.701          |
| Months in treatment                             | -0.020             | 0.008             | (-0.036, -0.004) | -2.42    | 0.015          |
| Suggested alternatives x Months in treatment    | -0.007             | 0.006             | (-0.018, 0.004)  | -1.28    | 0.202          |
| Accountable justification x Months in treatment | 0.005              | 0.006             | (-0.008, 0.017)  | 0.74     | 0.457          |
| Peer comparison x Months in treatment           | 0.005              | 0.007             | (-0.008, 0.018)  | 0.78     | 0.434          |
| Time (months)                                   | 0.008              | 0.005             | (-0.002, 0.017)  | 1.59     | 0.112          |
| Constant                                        | 0.044              | 0.122             | (-0.195, 0.283)  | 0.36     | 0.72           |

\* Robust Standard errors were used in model because the hierarchical mixed effects model failed to converge.

**eTable 7. Rate of Return Visit With Diagnosis of Concern, When Antibiotics Were Not Prescribed at the Index Visit, by Study Arm**

| <b>Study arm</b>                            | <b>Number of intervention-qualifying ARI encounters*</b> | <b>Number of intervention-qualifying ARI encounters where antibiotics were not prescribed†</b> | <b>Number of intervention-qualifying ARI encounters where antibiotics were not prescribed <u>and</u> with a RETURN visit within 30 days with a Diagnosis of Concern‡</b> | <b>Rate of RETURN Visit with Diagnosis of Concern§</b> | <b>95% Confidence Intervals</b> | <b>P value**</b> |
|---------------------------------------------|----------------------------------------------------------|------------------------------------------------------------------------------------------------|--------------------------------------------------------------------------------------------------------------------------------------------------------------------------|--------------------------------------------------------|---------------------------------|------------------|
| Control                                     | 4667                                                     | 3245                                                                                           | 14                                                                                                                                                                       | 0.43%                                                  | (0.24%, 0.70%)                  | Reference        |
| Suggested alternatives only                 | 6383                                                     | 4579                                                                                           | 16                                                                                                                                                                       | 0.35%                                                  | (0.20%, 0.55%)                  | 0.718            |
| Accountable justification only              | 5815                                                     | 4622                                                                                           | 16                                                                                                                                                                       | 0.35%                                                  | (0.20%, 0.54%)                  | 0.727            |
| Peer comparison only                        | 4781                                                     | 3781                                                                                           | 13                                                                                                                                                                       | 0.34%                                                  | (0.19%, 0.57%)                  | 0.722            |
| Accountable justification + Peer comparison | 4321                                                     | 3398                                                                                           | 48                                                                                                                                                                       | 1.41%                                                  | (1.05%, 1.85%)                  | <0.001           |

**eTable 7, Continued**

| <b>Study arm</b>                                                     | <b>Number of intervention-qualifying ARI encounters*</b> | <b>Number of intervention-qualifying ARI encounters where antibiotics were not prescribed†</b> | <b>Number of intervention-qualifying ARI encounters where antibiotics were not prescribed <u>and</u> with a RETURN visit within 30 days with a Diagnosis of Concern‡</b> | <b>Rate of RETURN Visit with Diagnosis of Concern§</b> | <b>95% Confidence Intervals</b> | <b>P value**</b> |
|----------------------------------------------------------------------|----------------------------------------------------------|------------------------------------------------------------------------------------------------|--------------------------------------------------------------------------------------------------------------------------------------------------------------------------|--------------------------------------------------------|---------------------------------|------------------|
| Accountable justification + Suggested alternatives                   | 7212                                                     | 5717                                                                                           | 22                                                                                                                                                                       | 0.38%                                                  | (0.24%, 0.57%)                  | 0.631            |
| Peer comparison + Suggested alternatives                             | 7363                                                     | 5993                                                                                           | 23                                                                                                                                                                       | 0.38%                                                  | (0.25%, 0.56%)                  | 0.635            |
| Accountable justification + Peer comparison + Suggested alternatives | 4990                                                     | 4164                                                                                           | 15                                                                                                                                                                       | 0.36%                                                  | (0.21%, 0.57%)                  | 0.687            |

\*Intervention-qualifying acute respiratory infections (ARI) encounters include all ARI visits eligible for the suggested alternatives and accountable justification interventions (not limited to the antibiotic-inappropriate ARI diagnoses that define the primary outcome).

†Subset of the intervention-qualifying ARI encounters for which no antibiotics were prescribed

‡Diagnosis of Concern (DoC): based on ICD9 codes of concern at revisit (See Table S6 in the Supplementary Appendix)

**eTable 7, Continued**

§Rate of RETURN Visit with DoC: # of qualifying ARI encounters where antibiotics were not prescribed and with a RETURN visit within 30 days with a Diagnosis of Concern / # of total qualifying ARI encounters where antibiotics were not prescribed

\*\*P values computed using difference between proportions (z value). With Bonferroni correction, the critical p is 0.007 (0.05/7).

\*Standard approaches for calculating confidence intervals of proportions were not valid for the safety analysis because these were very rare events. Therefore, we calculated Jeffrey's interval for rare events, an equal-tailed 95% confidence interval obtained when using noninformative prior for the binomial proportion p. The interval assumes an a prior Beta distribution with parameters Beta(1/2, 1/2). After observing x successes in n trials, the confidence interval is computed as a posterior Beta distribution with parameters(x + 1/2, n - x + 1/2).

Jeffreys, H. (1946, September). An invariant form for the prior probability in estimation problems. In Proceedings of the Royal Society of London A: Mathematical, Physical and Engineering Sciences (Vol. 186, No. 1007, pp. 453-461). The Royal Society.

Brown, L. D., Cai, T. T., & DasGupta, A. (2001). Interval estimation for a binomial proportion. Statistical science, 101-117.

**eTable 8. Specific Diagnoses of Concern Associated With Return Visits for Which Antibiotics Might Have Been Helpful in the Initial Visit**

| <b>Diagnosis of concern</b>                                          | <b>Pneumonia</b> | <b>Otitis media</b> | <b>Pneumonia and otitis media</b> |
|----------------------------------------------------------------------|------------------|---------------------|-----------------------------------|
| Suggested alternatives only                                          | 2                | 0                   | 0                                 |
| Accountable justification only                                       | 1                | 0                   | 0                                 |
| Peer comparison only                                                 | 0                | 1                   | 0                                 |
| Accountable justification + Peer comparison                          | 4                | 0                   | 1                                 |
| Accountable justification + Suggested alternatives                   | 0                | 0                   | 0                                 |
| Peer comparison + Suggested alternatives                             | 2                | 0                   | 0                                 |
| Accountable justification + Peer comparison + Suggested alternatives | 2                | 0                   | 0                                 |
